# Supplementary material for: In situ transformation of Co-MOF nanorods into Co3S4/Ni3S2 nanotube arrays for electrochemical biomass upgrading
Source: Royal Society of Chemistry journal article supplement (doi:10.1039/d3gc03151a), 2023-01-01
Supplement: d3gc03151a1.pdf [file d3gc03151a1.pdf]

**In-situ transformation of Co-MOF nanorods into  $\text{Co}_3\text{S}_4/\text{Ni}_3\text{S}_2$  nanotube arrays  
for electrochemical biomass upgrading**

Yixuan Feng <sup>a</sup>, Richard Lee Smith Jr<sup>b</sup>, Junyan Fu <sup>a</sup>, Xinhua Qi <sup>a,\*</sup>

<sup>a</sup> *College of Environmental Science and Engineering, Nankai University, No. 38, Tongyan Road,  
Jinnan District, Tianjin 300350, China*

<sup>b</sup> *Graduate School of Environmental Studies, Tohoku University, Aramaki Aza Aoba 468-1, Aoba-  
ku, Sendai 980-8572, Japan*

---

\* Corresponding author. E-mail: [qixinhua@nankai.edu.cn](mailto:qixinhua@nankai.edu.cn) (X. Qi).

## **Experimental section**

### **Materials and reagents**

Thioacetamide (TAA,  $\geq 99\%$ ) was obtained from Sinopharm Ltd. Cobalt nitrate hexahydrate ( $\text{Co}(\text{NO}_3)_2 \cdot 6\text{H}_2\text{O}$ , 99%), 5-hydroxymethylfurfural (HMF, 97%), 2-methylimidazole (2-MeIm, 98%), 2,5-furandicarboxylic acid (FDCA, 97%), 5-hydroxymethyl-2-furancarboxylic acid (HMFCFA, 97%), furfural (FF, 99%), furfuryl alcohol (FFA, 97%), 2-formyl-5-furancarboxylic acid (FFCA,  $>98\%$ ), 2-furoic acid (FA, 98%), benzyl alcohol (BA,  $\geq 99\%$ ), benzoic acid ( $\geq 99\%$ ) and potassium hydroxide (KOH, 95%) were purchased from Macklin Ltd. 2-formyl-5-furancarboxylic acid (FFCA, 98%) and 2,5-diformylfuran (DFF, 98%) were purchased from Aladdin Ltd. All reagents were used without further purification.

### **Characterization of materials**

X-ray photoelectron spectroscopy (XPS) was performed on a Thermo ESCALAB Xi with Al  $K\alpha$  radiation and charge correction was carried out using the binding energy of C 1s (284.8 eV) as the energy standard. Morphologies of samples were observed by scanning electron microscopy (SEM, ZEISS GeminiSEM 300). Microstructures of ultrasonically exfoliated samples from NF were characterized with field-emission transmission electron microscopy (TEM, Talos F200X G2). In the HRTEM analyses, an energy dispersive X-ray spectrometer (EDS) connected to the instrument was used to determine elements of the sample. XRD patterns were obtained using an Ultima IV X-ray diffractometer with Cu-K $\alpha$  radiation (Rigaku, Japan) as the X-ray tube at 40 kV and 40 mA and with a scanning rate of  $4^\circ \text{ min}^{-1}$ .

## Electrochemical measurements

All electrochemical measurements were performed on a CHI 660E electrochemical workstation with a typical three-electrode system at room temperature. HMF electrooxidation performance was measured in an H-type device being divided with a Nafion 117 membrane. The anolyte cell had 20 mL of 1 M KOH electrolyte (pH 13.6) with different concentrations of HMF (10 mM, 50 mM, 100 mM), while the catholyte cell contained 20 mL of 1 M KOH electrolyte. The Co-Ni<sub>3</sub>S<sub>2</sub> nanotube arrays were supported on NF (1 × 2 cm<sup>2</sup>) and served as the working electrode directly. Ag/AgCl and Pt foil (1 × 1 cm<sup>2</sup>) were employed as the reference and counter electrodes, respectively. Measured potentials were converted to the RHE scale with the following equation:  $E_{\text{RHE}} = E_{\text{Ag/AgCl}} + 0.059 \times \text{pH} + 0.197$ . Linear sweep voltammetry (LSV) curves were recorded at a scan rate of 5 mV s<sup>-1</sup> without iR compensation. The CVs with different scan rates (20, 30, 40, 50, 60) mV/s between the potential intervals of 1.07 V to 1.15 V vs. RHE were collected for calculating the double-layer capacitance ( $C_{\text{dl}}$ ). Electrochemical impedance spectroscopy (EIS) tests were conducted at frequencies from 0.01 Hz to 10<sup>5</sup> Hz with an amplitude of 10 mV.

## Product analyses

In general, 100 μL electrolyte was periodically extracted during potentiostatic electrolysis experiments and diluted to 1 mL with deionized water, followed by neutralization with a strongly acidic ion exchange resin (Dowex 50wx8-100), which was then filtered with a 0.22 μm polyethersulfone membrane. HMF, FF, and FA and their oxidation products were analyzed using high-performance liquid chromatography

(HPLC, Agilent 1260 Infinity II) equipped with an EC-C18 column (4.6 mm 150 mm, 4 mm) and the wavelength of the UV-Vis detector was set at 265 nm. A solution of 20% ammonium formate (5 mM) and 80% methanol served as mobile phase A and mobile phase B, respectively, the flow rate was  $0.5 \text{ mL} \cdot \text{min}^{-1}$  and the column temperature was controlled at  $30 \text{ }^\circ\text{C}$ . BA and its oxidation products were analyzed with external standard method, using gas chromatography (GC, Agilent 8600) equipped with a Rtx-1700 column ( $30 \text{ m} \times 0.25 \text{ mm}$ ,  $0.25 \text{ }\mu\text{m}$ ) and flame ionization detector (FID). After the electrolysis reaction, the sample was neutralized with a strong acid ion exchange resin (Dowex 50wx8-100) and subsequently diluted with ethanol (chromatographic grade). Temperature program used in the GC analyses was as follows: initial temperature =  $100 \text{ }^\circ\text{C}$ , 1 min; final temperature =  $250 \text{ }^\circ\text{C}$ , 10 min; heating rate =  $20 \text{ }^\circ\text{C min}^{-1}$ . The temperature of the detector was  $300 \text{ }^\circ\text{C}$ . Before each run, the injection needle was flushed three times with ethanol (chromatographic grade) to eliminate cross-contamination.

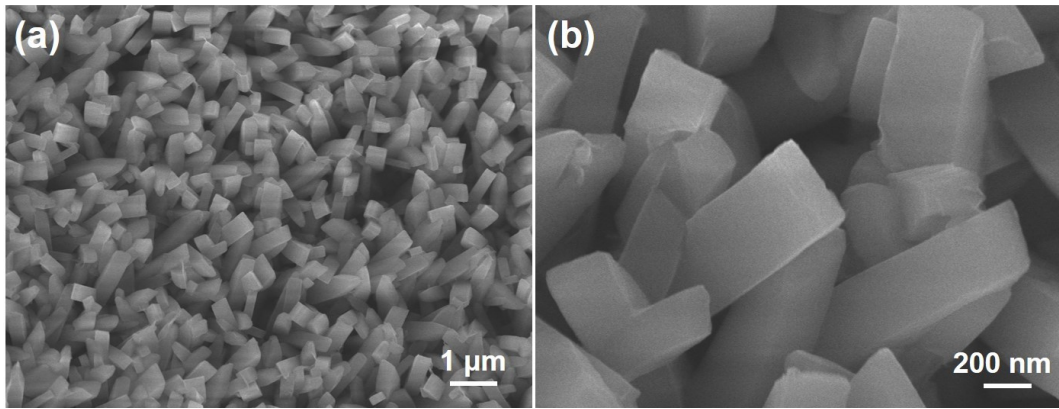

Figure S1. SEM images of Co-MOF.

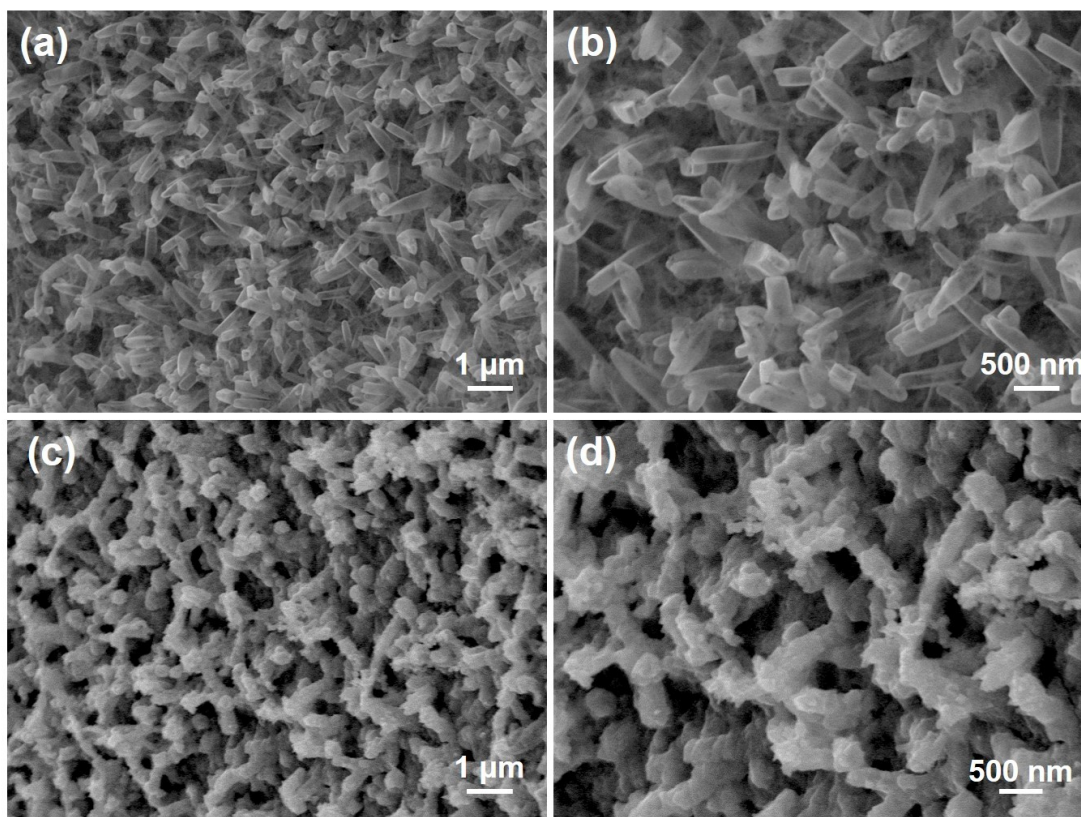

Figure S2. SEM images of (a, b)  $\text{Co}_3\text{S}_4/\text{Ni}_3\text{S}_2$ -1 and (c, d)  $\text{Co}_3\text{S}_4/\text{Ni}_3\text{S}_2$ -5. Suffix values -1, -3, -5 refer to solvothermal sulfurization times in hours.

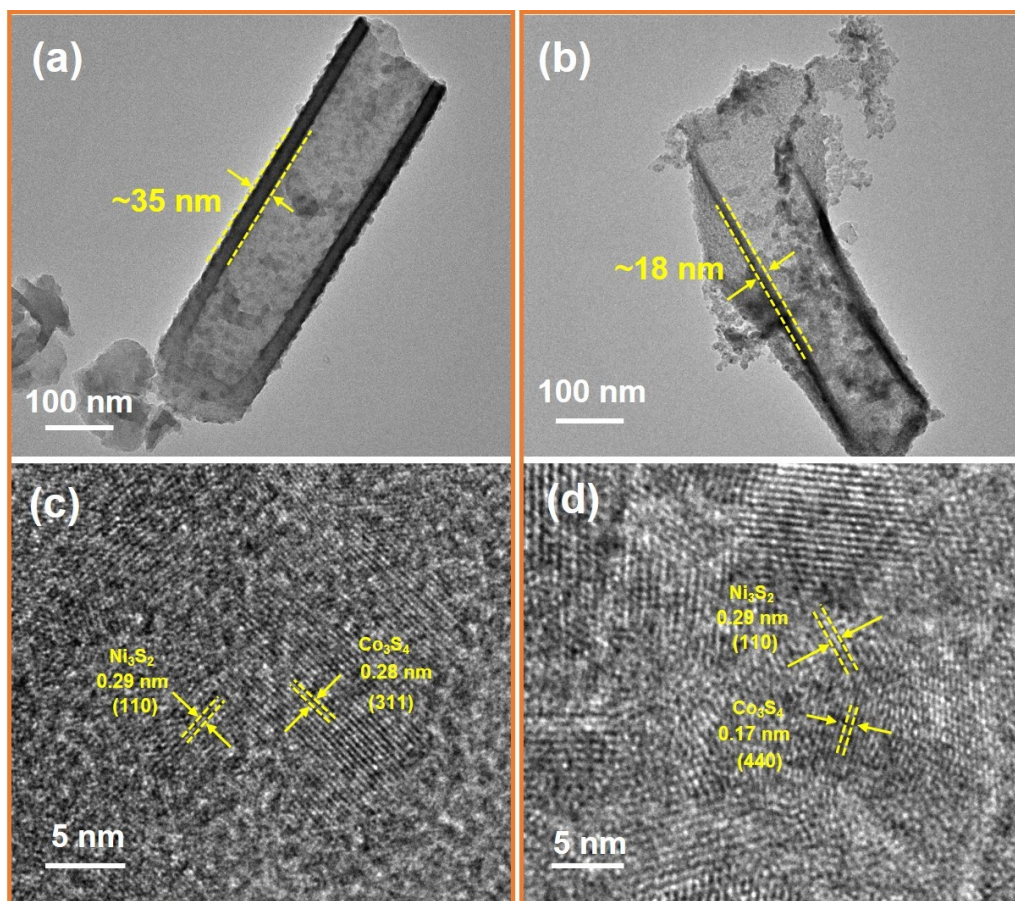

Figure S3. TEM images of (a) Co<sub>3</sub>S<sub>4</sub>/Ni<sub>3</sub>S<sub>2</sub>-1 and (b) Co<sub>3</sub>S<sub>4</sub>/Ni<sub>3</sub>S<sub>2</sub>-5; HRTEM images of (c) Co<sub>3</sub>S<sub>4</sub>/Ni<sub>3</sub>S<sub>2</sub>-1 and (d) Co<sub>3</sub>S<sub>4</sub>/Ni<sub>3</sub>S<sub>2</sub>-5. Suffix values -1, -3, -5 refer to solvothermal sulfurization times in hours

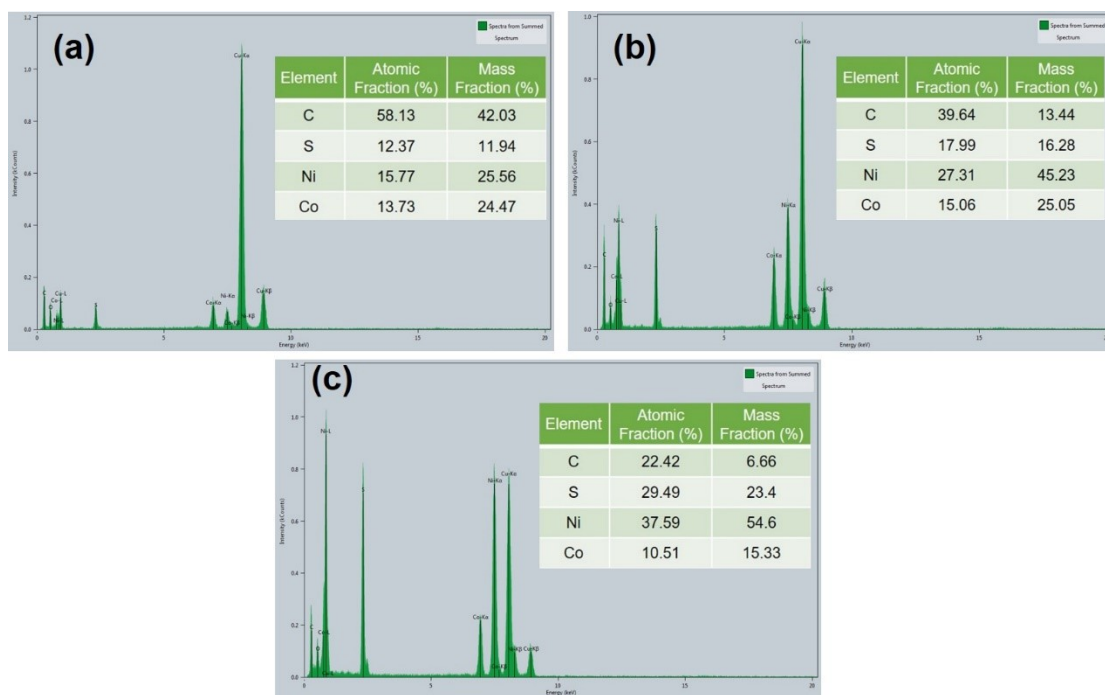

Figure S4. TEM-EDS of (a)  $\text{Co}_3\text{S}_4/\text{Ni}_3\text{S}_2$ -1, (b)  $\text{Co}_3\text{S}_4/\text{Ni}_3\text{S}_2$ -3 and (c)  $\text{Co}_3\text{S}_4/\text{Ni}_3\text{S}_2$ -5.

Suffix values -1, -3, -5 refer to solvothermal sulfurization times in hours.



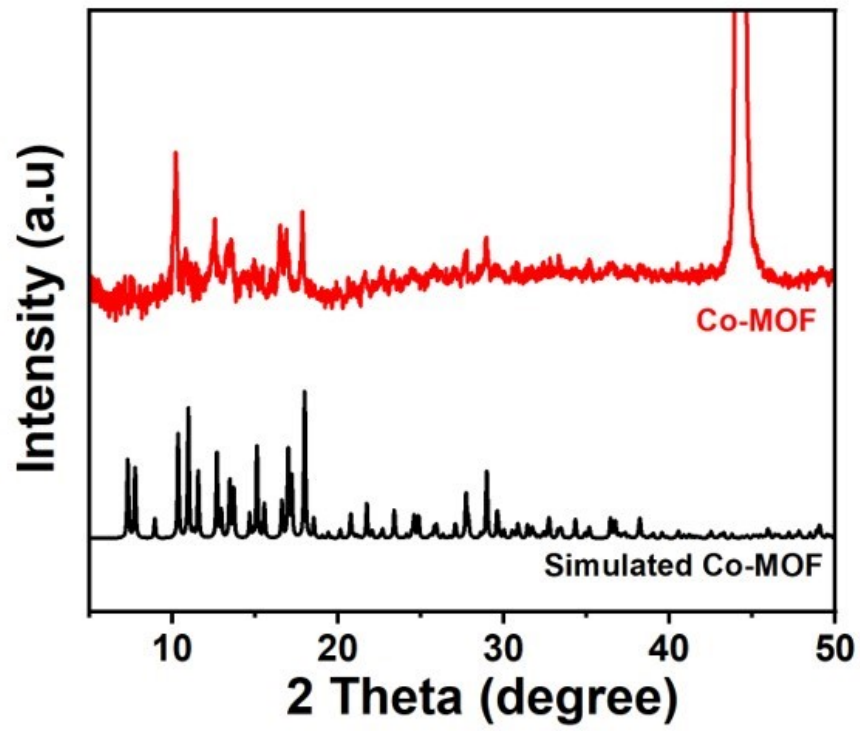

Figure S5. XRD patterns of Co-MOF.

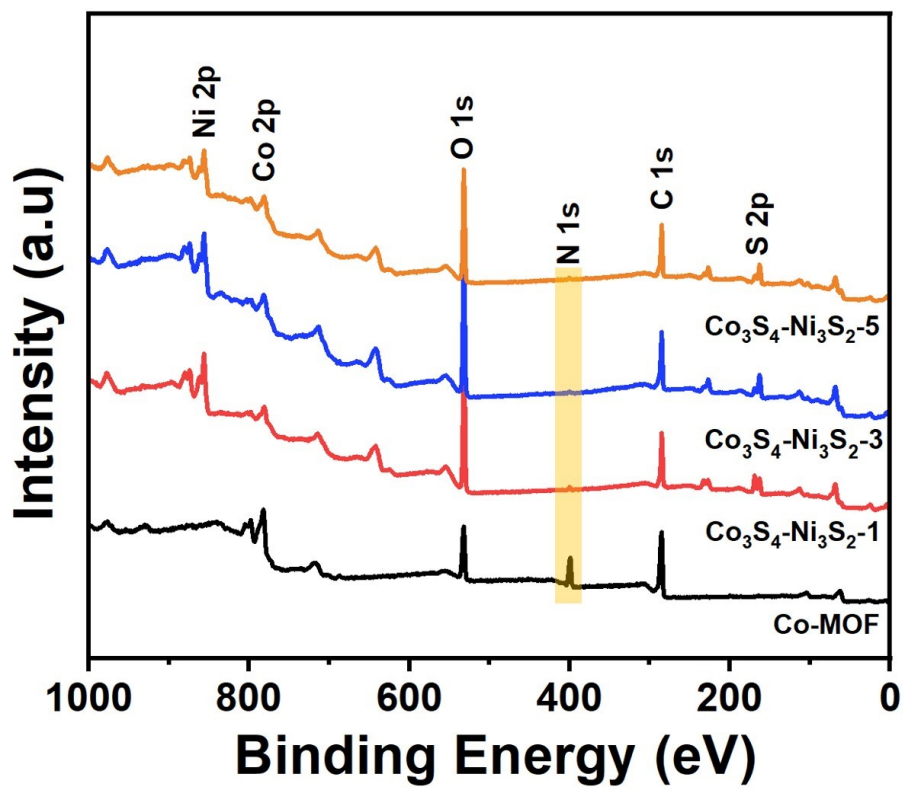

Figure S6. XPS survey spectrum of Co-MOF and  $\text{Co}_3\text{S}_4/\text{Ni}_3\text{S}_2\text{-}t$  ( $t = 1$  h, 3 h, 5 h).

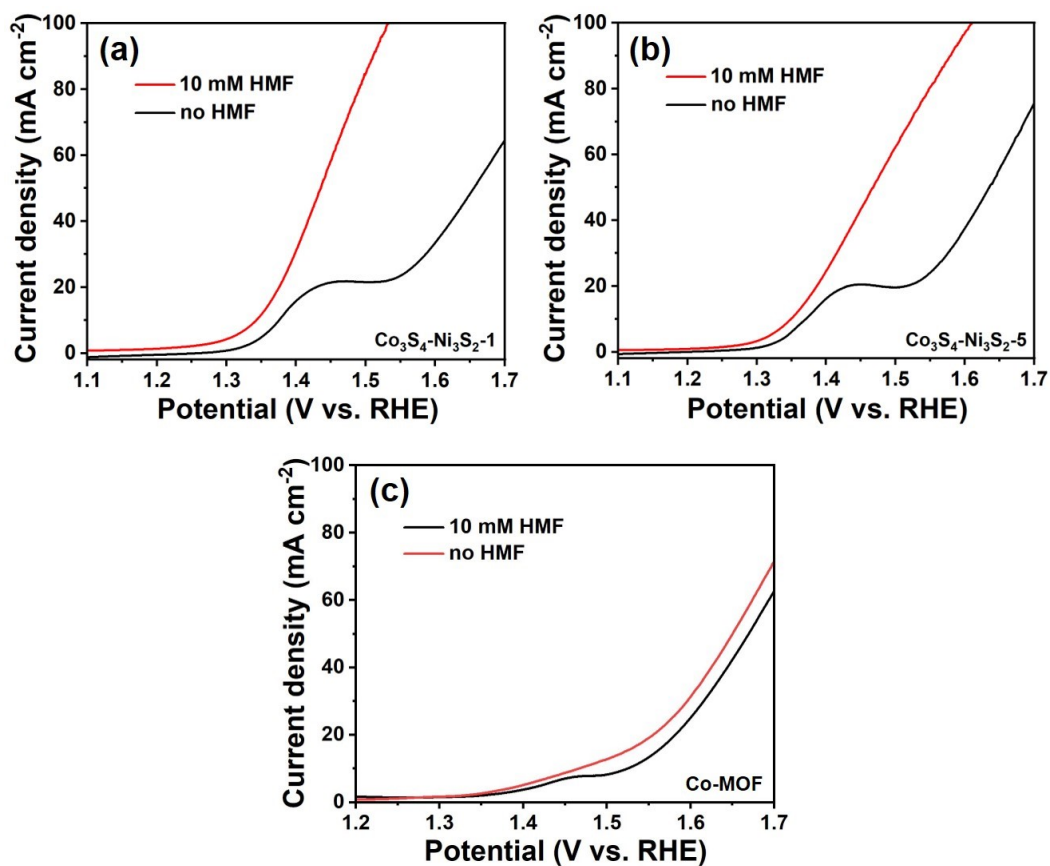

Figure S7. Linear sweep voltammetry curves of (a)  $\text{Co}_3\text{S}_4/\text{Ni}_3\text{S}_2$ -1, (b)  $\text{Co}_3\text{S}_4/\text{Ni}_3\text{S}_2$ -5 and (c) Co-MOF in 1 M KOH with and without 10 mM HMF.

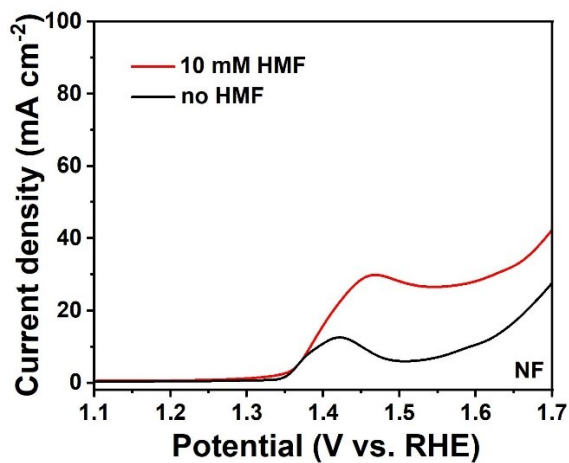

Figure S8. Linear sweep voltammetry curves of nickel foam (NF) in 1 M KOH with and without 10 mM HMF.

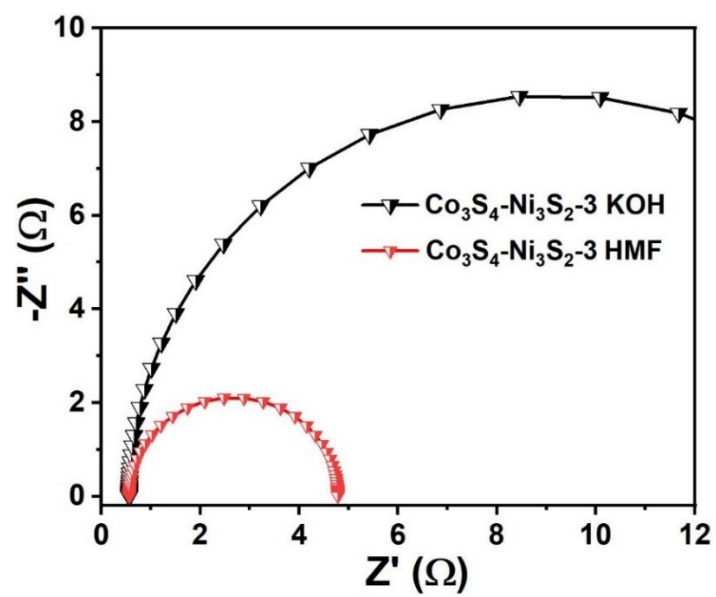

Figure S9. Nyquist plots of  $\text{Co}_3\text{S}_4/\text{Ni}_3\text{S}_2-3$  in 1 M KOH with and without 50 mM HMF.

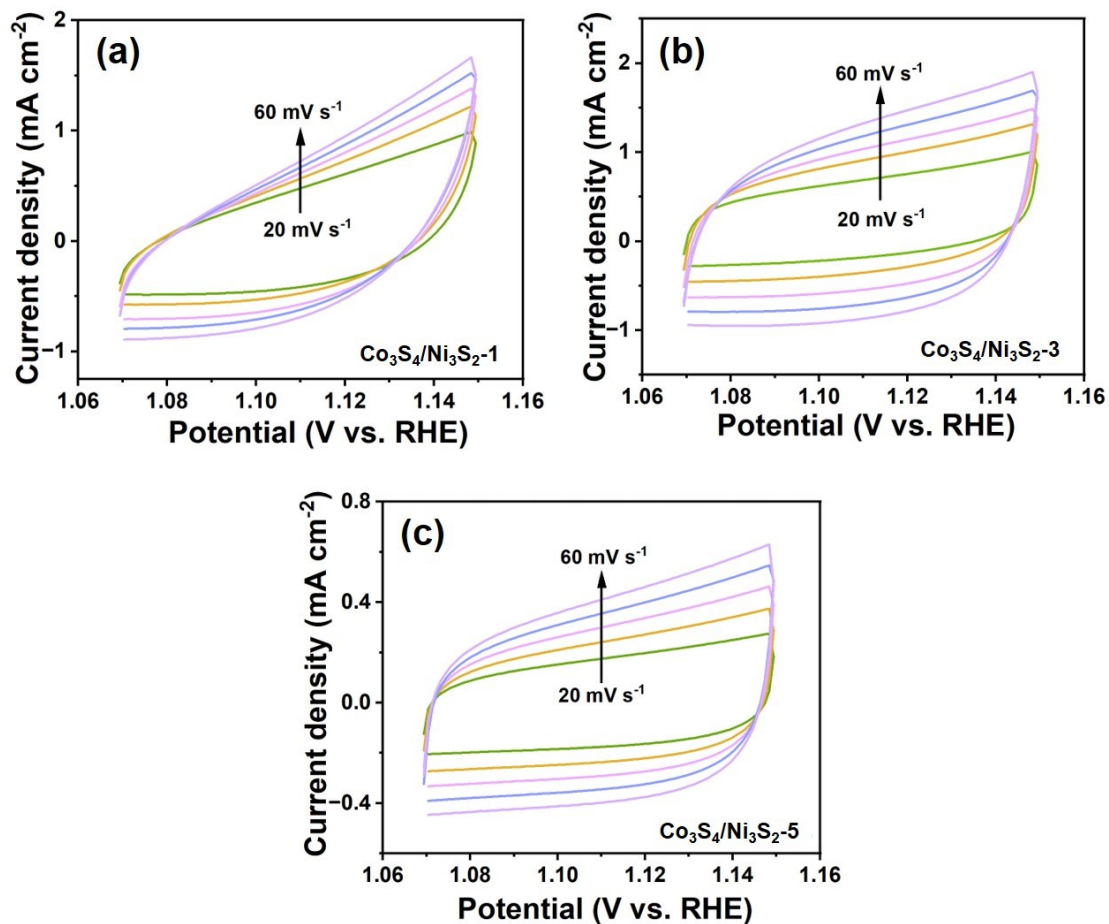

Figure S10. Cyclic voltammetry curves of: (a) Co<sub>3</sub>S<sub>4</sub>/Ni<sub>3</sub>S<sub>2</sub>-1, (b) Co<sub>3</sub>S<sub>4</sub>/Ni<sub>3</sub>S<sub>2</sub>-3 and (c) Co<sub>3</sub>S<sub>4</sub>/Ni<sub>3</sub>S<sub>2</sub>-5 at different scan rates. Suffix values -1, -3, -5 refer to solvothermal sulfurization times in hours.

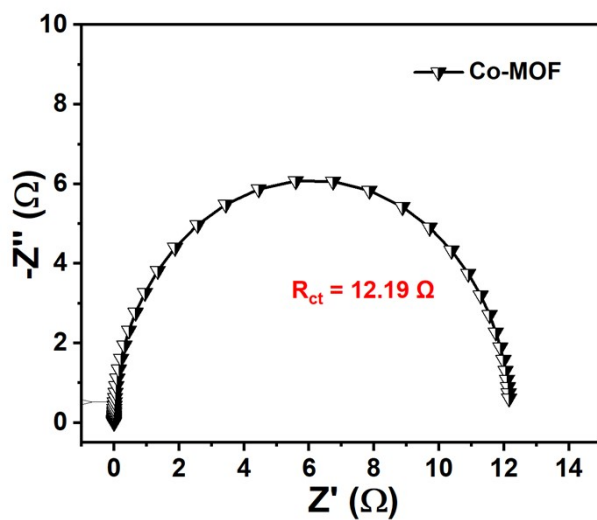

Figure S11. Nyquist plots of Co-MOF in 1 M KOH with 50 mM HMF.

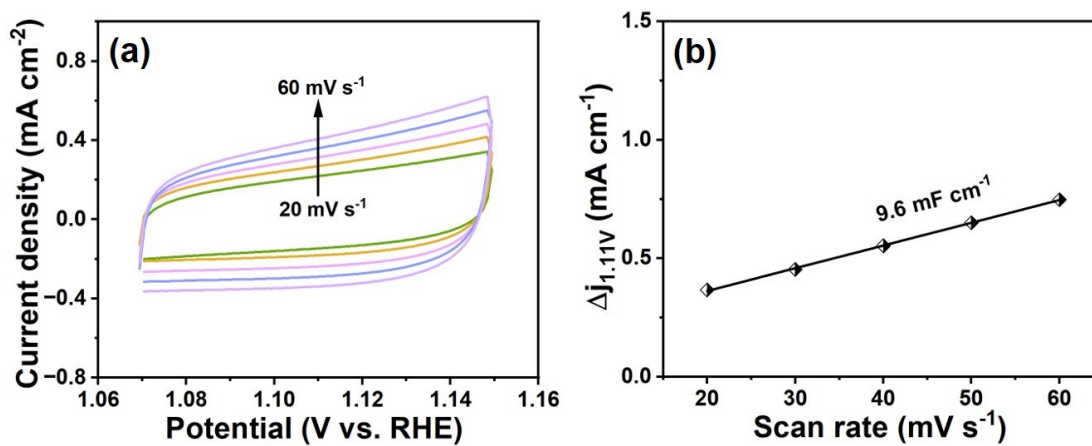

Figure S12. Electrochemical characterization of Co-MOF in 1 M KOH: (a) Cyclic voltammetry curves and (b) capacitive currents.

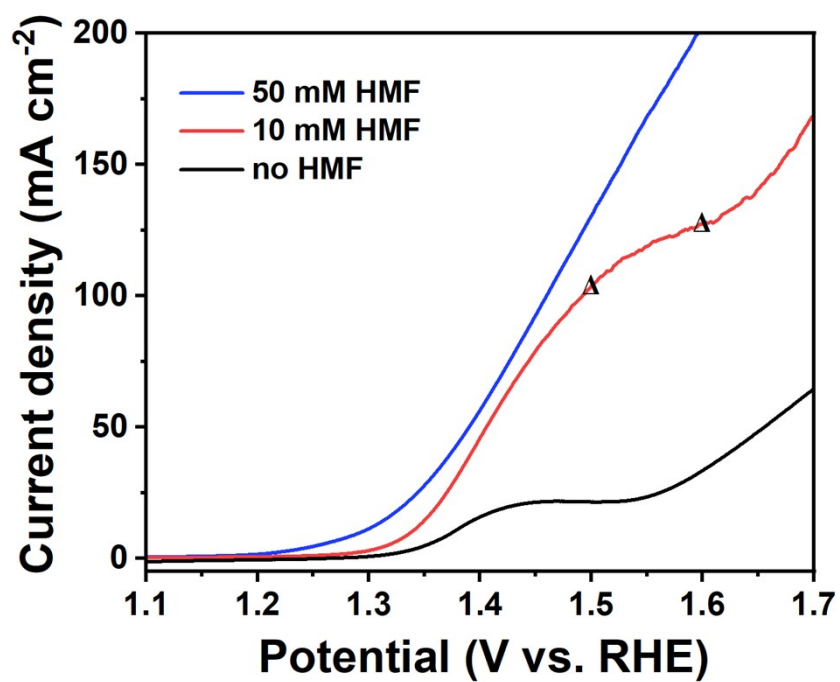

Figure S13. Linear sweep voltammetry curves for  $\text{Co}_3\text{S}_4/\text{Ni}_3\text{S}_2$  electrode in 1 M KOH for HMF concentrations of (0, 10, 50) mM.

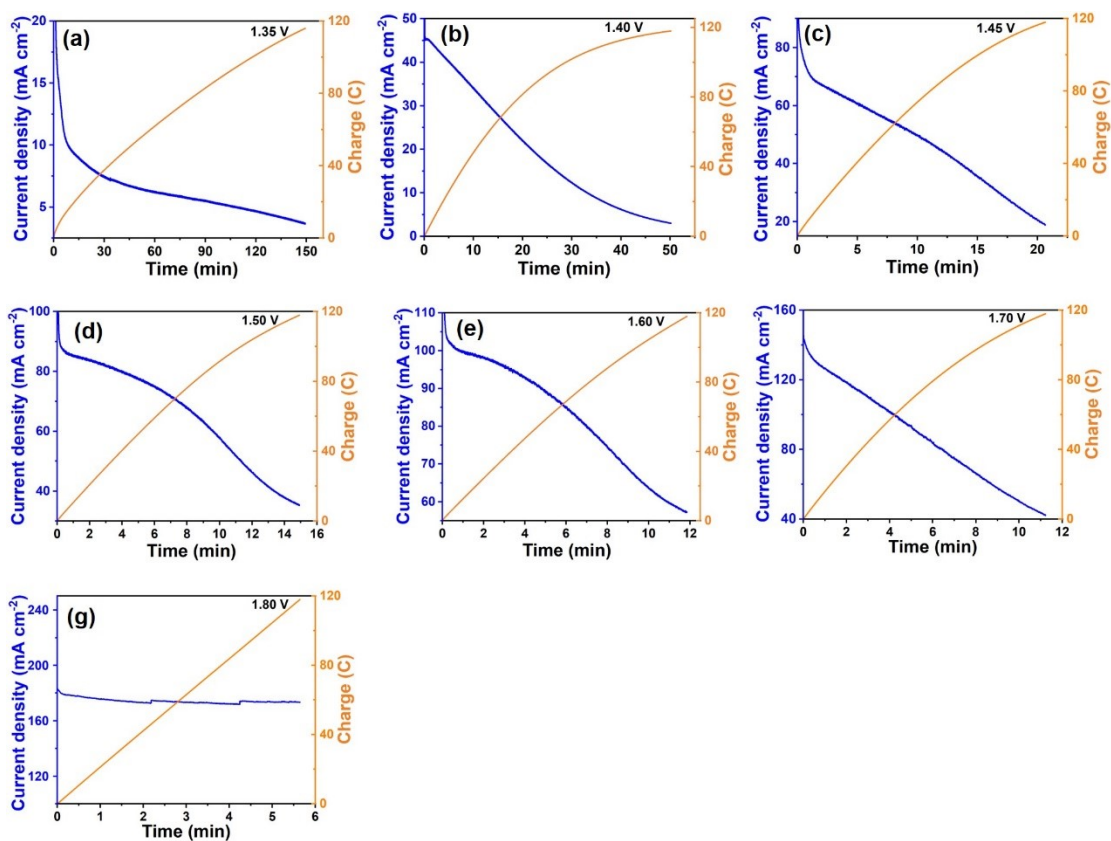

Figure S14. Current versus time and current versus charge for  $\text{Co}_3\text{S}_4/\text{Ni}_3\text{S}_2$  electrode at different applied potentials in 1.0 M KOH for 10 mM HMF after 58 C charges were passed vs. RHE: (a) 1.35 V, (b) 1.40 V, (c) 1.45 V, (d) 1.50 V, (e) 1.60 V, (f) 1.70 V and (g) 1.80 V.



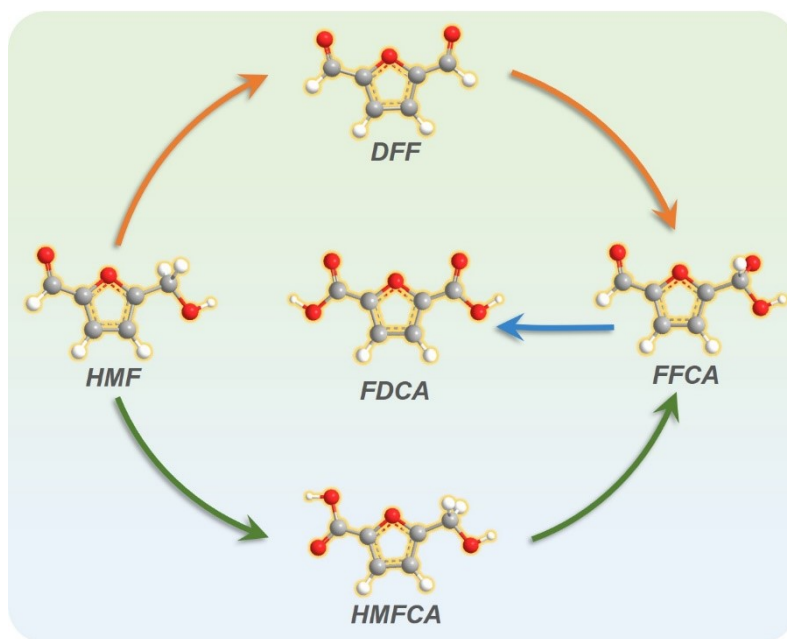

Figure S15. Two possible HMF oxidation pathways to FDCA: 5-hydroxymethyl-2-furanformic acid (HMFCFA) pathway and 2,5-diformylfuran (DFF) pathway.

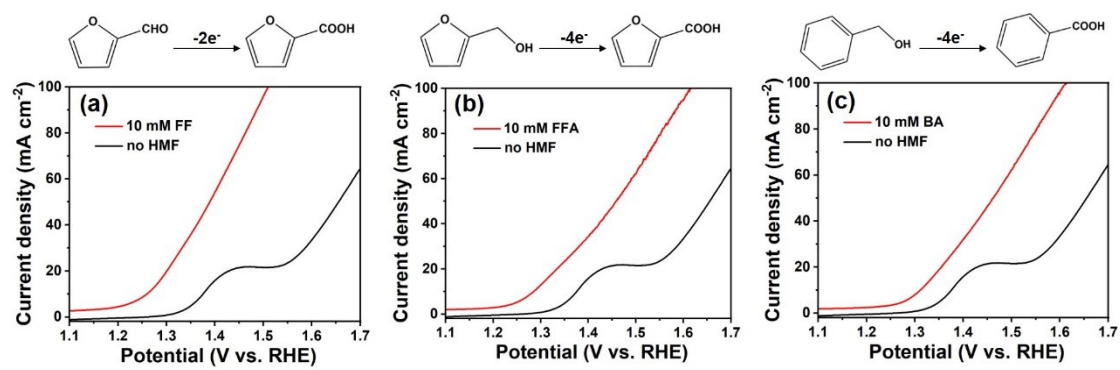

Figure S16. Linear sweep voltammetry curves of Co<sub>3</sub>S<sub>4</sub>/Ni<sub>3</sub>S<sub>2</sub> in 1 M KOH with and without 10 mM organic substrate: (a) furfural (FF), (b) furfuryl alcohol (FFA), (c) benzyl alcohol (BA).

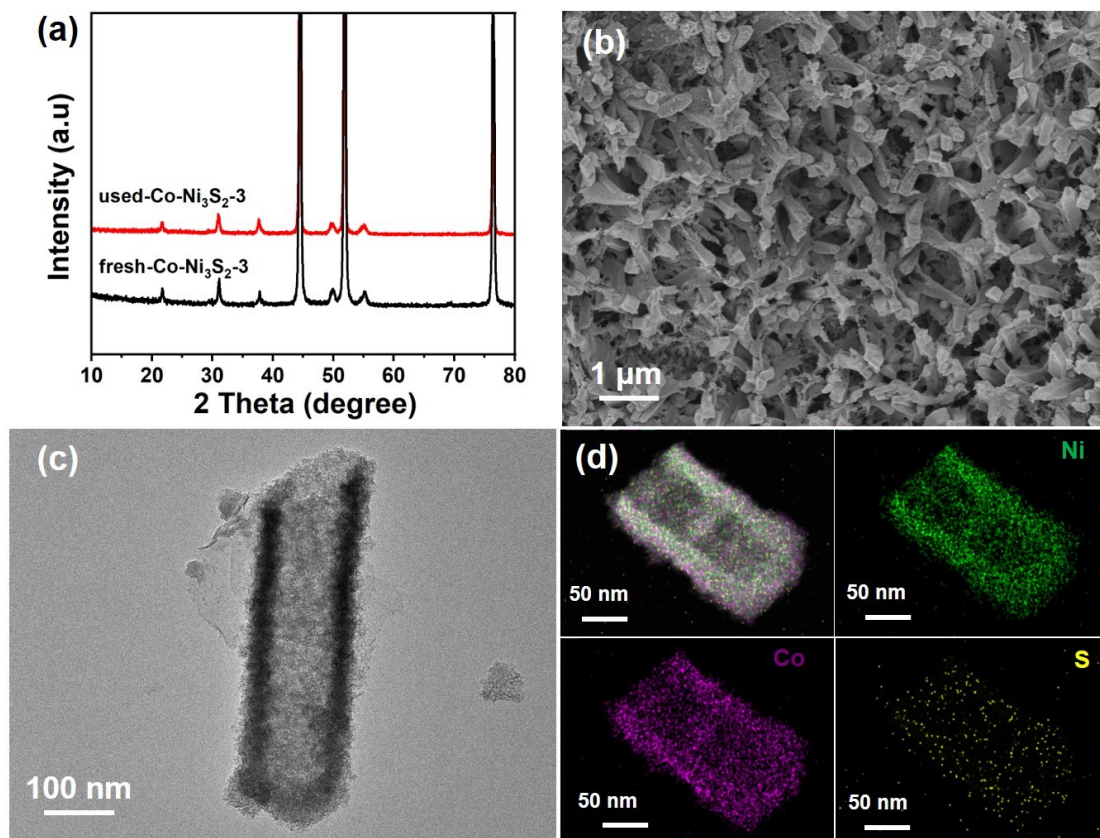

Figure S17. Crystal structure and morphological of  $\text{Co}_3\text{S}_4/\text{Ni}_3\text{S}_2$  electrode after electrocatalytic oxidation of HMF: (a) XRD patterns, (b) SEM image, (c) TEM image and (d) TEM-EDS elemental mappings.

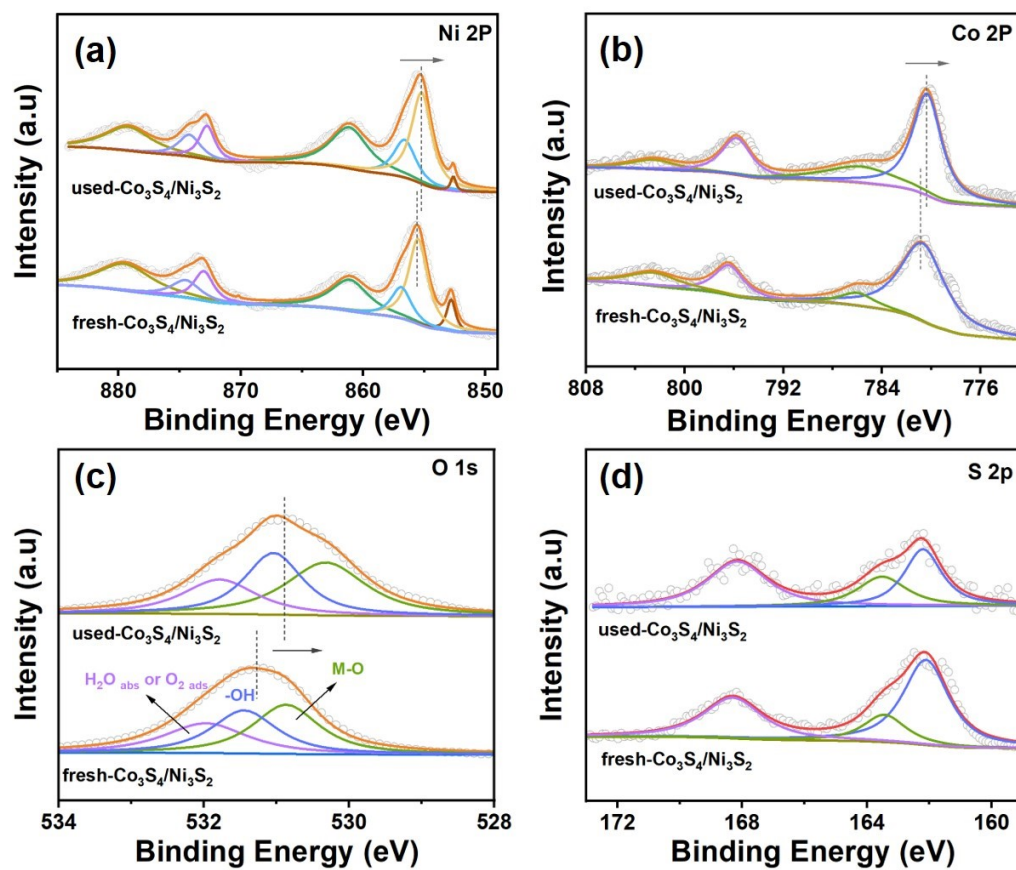

Figure S18. XPS spectra of Ni 2p, Co 2p, S 2p and O 1s of used- $\text{Co}_3\text{S}_4/\text{Ni}_3\text{S}_2$  and fresh- $\text{Co}_3\text{S}_4/\text{Ni}_3\text{S}_2$ .

Table S1. EIS fitted simulation parameters of  $\text{Co}_3\text{S}_4/\text{Ni}_3\text{S}_2$ -1,  $\text{Co}_3\text{S}_4/\text{Ni}_3\text{S}_2$ -3 and  $\text{Co}_3\text{S}_4/\text{Ni}_3\text{S}_2$ -5.

| Samples                                          | $R_{\text{ct}}$ ( $\Omega$ ) | $R_s$ ( $\Omega$ ) | $C_{\text{dl}}$ (F) |
|--------------------------------------------------|------------------------------|--------------------|---------------------|
| $\text{Co}_3\text{S}_4/\text{Ni}_3\text{S}_2$ -1 | 4.53                         | 2.59               | 1.65                |
| $\text{Co}_3\text{S}_4/\text{Ni}_3\text{S}_2$ -3 | 4.08                         | 1.37               | 2.07                |
| $\text{Co}_3\text{S}_4/\text{Ni}_3\text{S}_2$ -5 | 5.04                         | 9.30               | 2.62                |

Table S2. Performance of  $\text{Co}_3\text{S}_4/\text{Ni}_3\text{S}_2$ -3 electrode developed in this work (\*) and literature reported materials for oxidation of 5-hydroxymethylfurfural (HMF) to 2,5-furandicarboxylic acid (FDCA) showing applied potentials and faradaic efficiencies (FE).

| Electrode Material                            | Electrolyte | HMF Conc. (mM) | Applied potential (V vs. RHE) | FDCA yield (%) | FE of FDCA (%) | Ref.      |
|-----------------------------------------------|-------------|----------------|-------------------------------|----------------|----------------|-----------|
| $\text{Co}_3\text{S}_4/\text{Ni}_3\text{S}_2$ | 1 M KOH     | 10             | 1.43                          | ~100           | ~100           | This work |
| $\text{Co}_3\text{S}_4/\text{Ni}_3\text{S}_2$ | 1 M KOH     | 50             | 1.43                          | 98.5           | 97.2           | This work |
| $\text{Co}_3\text{S}_4/\text{Ni}_3\text{S}_2$ | 1 M KOH     | 100            | 1.43                          | 91.8           | 90.2           | This work |
| NiO-CMK-1                                     | 0.2 M KOH   | 20             | 1.73                          | -              | 51.4           | 1         |
| NiCoBDC-NF                                    | 0.1 M KOH   | 10             | 1.55                          | 99             | 78.8           | 2         |
| NiCoFe-LDHs                                   | 1 M NaOH    | 10             | 1.52                          | ~82            | -              | 3         |
| P-HEOs/CP                                     | 1 M KOH     | 10             | 1.50                          | 97.4           | 96.6           | 4         |
| $\text{NiCo}_2\text{O}_4$                     | 1 M KOH     | 5              | 1.50                          | 72             | 80             | 5         |
| d-NiFe LDH/CP                                 | 1 M KOH     | 10             | 1.48                          | 96.8           | 84.5           | 6         |
| $\text{NiS}_x/\text{Ni}_2\text{P}$            | 1 M KOH     | 10             | 1.46                          | 98.5           | 95.1           | 7         |
| $\text{Ni}_{0.9}\text{Cu}_{0.1}(\text{OH})_2$ | 1 M KOH     | 5              | 1.45                          | 91.2           | 91.2           | 8         |
| CoO-CoSe <sub>2</sub>                         | 1 M NaOH    | 10             | 1.43                          | 99             | 97.9           | 9         |
| hp-Ni                                         | 1 M KOH     | 10             | 1.42                          | -              | 92–98          | 10        |
| InOOH-O <sub>v</sub>                          | 1 M KOH     | 10             | 1.48                          | 91.6           | 90.7           | 11        |
| t-Ni1Co1-MOF                                  | 1 M KOH     | 10             | 1.40                          | 96             | 96             | 12        |

Key. CMK: carbon mesostructured from Korea; NF: nickel foam; LDH: layered double hydroxide;

HEO: high entropy oxide; CP: carbon paper; hp: hierarchically porous; PBA: Prussian Blue

Analogue; t: transformed; MOF: metal-organic framework.

Table S3. Electrochemical oxidation of biomass-related substrates with  $\text{Co}_3\text{S}_4/\text{Ni}_3\text{S}_2$ -3 electrode.

| Electrolyte         | Applied potential<br>(V vs. RHE) | Oxidation<br>product | Yield<br>(%) | FE<br>(%) |
|---------------------|----------------------------------|----------------------|--------------|-----------|
| 1 M KOH + 10 mM FF  | 1.43                             | FA                   | 99.2         | 98.3      |
| 1 M KOH + 10 mM FFA | 1.43                             | FA                   | 98.7         | 99.0      |
| 1 M KOH + 10 mM BA  | 1.43                             | BA                   | 98.5         | 96.4      |

## Reference

1. F. J. Holzhaeuser, T. Janke, F. Oeztas, C. Broicher and R. Palkovits, *Adv. Sustain. Syst.*, 2020, **4**, 1900151.
2. M. Cai, Y. Zhang, Y. Zhao, Q. Liu, Y. Li and G. Li, *J. Mater. Chem. A*, 2020, **8**, 20386-20392.
3. M. Zhang, Y. Q. Liu, B. Y. Liu, Z. Chen, H. Xu and K. Yan, *ACS Catal.*, 2020, **10**, 5179-5189.
4. K. [Gu, D. Wang, C. Xie, T. Wang, G. Huang, Y. Liu, Y. Zou, L. Tao and S. Wang, *Angew. Chem. Int. Ed.*, 2021, **60**, 20253-20258.
5. M. J. Kang, H. Park, J. Jegal, S. Y. Hwang, Y. S. Kang and H. G. Cha, *Appl. Catal. B*, 2019, **242**, 85-91.
6. Y.-F. Qi, K.-Y. Wang, Y. Sun, J. Wang and C. Wang, *ACS Sustain. Chem. Eng.*, 2022, **10**, 645-654.
7. B. Zhang, H. Fu and T. Mu, *Green Chem.*, 2022, **24**, 877-884.
8. J. Zhang, P. Yu, G. Zeng, F. Bao, Y. Yuan and H. Huang, *J. Mater. Chem. A*, 2021, **9**, 9685-9691.
9. X. Huang, J. L. Song, M. L. Hua, Z. B. Xie, S. S. Liu, T. B. Wu, G. Y. Yang and B. X. Han, *Green Chem.*, 2020, **22**, 843-849.
10. B. You, X. Liu, X. Liu and Y. J. Sun, *ACS Catal.*, 2017, **7**, 4564-4570.
11. F. Ye, S. Zhang, Q. Cheng, Y. Long, D. Liu, R. Paul, Y. Fang, Y. Su, L. Qu, L. Dai and C. Hu, *Nat. Commun.*, 2023, **14**, 2040-2040.
12. X. Deng, M. Li, Y. Fan, L. Wang, X.-Z. Fu and J.-L. Luo, *Appl. Catal. B*, 2020,



278, 119339.
